# Supplementary material for: Coexistence of multiple minor states of fatty acid binding protein and their functional relevance
Source: PubMed Central journal article supplement (PMC5039767; doi:10.1038/srep34171), 2016-09-28
Supplement: srep34171-s1.pdf [file srep34171-s1.pdf]

## **Supplementary Information**

### **Coexistence of multiple minor states of fatty acid binding protein and their functional relevance**

Binhan Yu and Daiwen Yang\*

## Calculation of RD rates and CEST intensities for exchange models I and IV

The theoretical relaxation rate at a given CPMG field strength ( $\nu_{\text{CPMG}}$ ) was calculated by

$$R_n^{\text{cal}} = \frac{-\ln[M_{n\tau}(2)/M_0(2)]}{T_{\text{CPMG}}}, \quad [1]$$

where  $T_{\text{CPMG}} = 4n\tau$  and  $\nu_{\text{CPMG}} = n/T_{\text{CPMG}}$ ,  $T_{\text{CPMG}}$  is the total time of the CPMG period,  $\tau$  is half of the delay between the centers of two successive  $180^\circ$  pulses,  $2n$  is number of CPMG pulses;  $M_{n\tau}(2)$  and  $M_0(2)$  are the second element of magnetization vector  $M_{n\tau}$  and  $M_0$ , respectively,  $M_0 = [p_1 \ p_2 \ p_3]^T$  or  $[p_1 \ p_2 \ p_3 \ p_4]^T$  for 3-state or 4-state exchange,  $p_j$  is the population of state  $j$  ( $j=1, 2, 3, 4$ ; which correspond to state  $I_1, N, I_2$ , and  $I_3$  in scheme 1 in the main text);  $M_{n\tau}$  is given by

$$M_{n\tau} = [\exp(-B\tau) * \exp(-B^*\tau) * \exp(-B\tau) * \exp(-B^*\tau)]^n * M_0, \quad [2]$$

where  $B$  is the exchange matrix and  $B^*$  is the conjugate of  $B$ . For a 3-state exchange (model I),  $B$  is given by

$$B = \begin{bmatrix} R_{21} + k_{12} + i\Omega_1 & -k_{21} & 0 \\ -k_{12} & R_{22} + k_{21} + k_{23} + i\Omega_2 & -k_{32} \\ 0 & -k_{23} & R_{23} + k_{32} + i\Omega_3 \end{bmatrix}. \quad [3]$$

For a 4-state exchange (model IV),  $B$  is given by

$$B = \begin{bmatrix} R_{21} + k_{12} + i\Omega_1 & -k_{21} & 0 & 0 \\ -k_{12} & R_{22} + k_{21} + k_{23} + k_{24} + i\Omega_2 & -k_{32} & -k_{42} \\ 0 & -k_{23} & R_{23} + k_{32} + i\Omega_3 & 0 \\ 0 & -k_{24} & 0 & R_{24} + k_{42} + i\Omega_4 \end{bmatrix}. \quad [4]$$

In eqs. 3 and 4,  $R_{2j}$  and  $\Omega_j$  are the transverse relaxation rate and resonant frequency (in radians per second) of a spin at state  $j$ , respectively;  $k_{jk}$  is the conversion rate from state  $j$  to state  $k$ ;  $i = \sqrt{-1}$ .

The theoretical intensity of a spin at state  $N$  (or state 2) at a given weak rf field was calculated by

$$I^{\text{cal}} = M(6), \quad [5]$$

where  $M(6)$  is the 6<sup>th</sup> element of magnetization vector  $M$ .  $M$  is given by

$$M = \exp(-At)M_0, \quad [6]$$

where  $M_0$  is the initial magnetization vector and equal to  $[0 \ 0 \ p_1 \ 0 \ 0 \ p_2 \ 0 \ 0 \ p_3]^T$  for a 3-state exchange and  $[0 \ 0 \ p_1 \ 0 \ 0 \ p_2 \ 0 \ 0 \ p_3 \ 0 \ 0 \ p_4]^T$  for a 4-state exchange;  $t$  is the saturation time;  $A$  is an exchange matrix. For a 3-state model (model I),  $A$  is given by

$$A = \begin{bmatrix} R_{21}+k_{12} & -\Delta\omega_1 & \omega_y & -k_{21} & 0 & 0 & 0 & 0 & 0 & 0 \\ \Delta\omega_1 & R_{21}+k_{12} & -\omega_x & 0 & -k_{21} & 0 & 0 & 0 & 0 & 0 \\ -\omega_y & \omega_x & R_{11}+k_{12} & 0 & 0 & -k_{21} & 0 & 0 & 0 & 0 \\ -k_{12} & 0 & 0 & R_{22}+k_{21}+k_{23} & -\Delta\omega_2 & \omega_y & -k_{32} & 0 & 0 & 0 \\ 0 & -k_{12} & 0 & \Delta\omega_2 & R_{22}+k_{21}+k_{23} & -\omega_x & 0 & -k_{32} & 0 & 0 \\ 0 & 0 & -k_{12} & -\omega_y & \omega_x & R_{12}+k_{21}+k_{23} & 0 & 0 & 0 & -k_{32} \\ 0 & 0 & 0 & -k_{23} & 0 & 0 & R_{23}+k_{32} & -\Delta\omega_3 & \omega_y & 0 \\ 0 & 0 & 0 & 0 & -k_{23} & 0 & \Delta\omega_3 & R_{23}+k_{32} & -\omega_x & 0 \\ 0 & 0 & 0 & 0 & 0 & -k_{23} & -\omega_y & \omega_x & R_{13}+k_{32} & 0 \end{bmatrix}. \quad [7]$$

For a 4-state model (model IV), A is given by

$$A = \begin{bmatrix} R_{21}+k_{12} & -\Delta\omega_1 & \omega_y & -k_{21} & 0 & 0 & 0 & 0 & 0 & 0 & 0 & 0 \\ \Delta\omega_1 & R_{21}+k_{12} & -\omega_x & 0 & -k_{21} & 0 & 0 & 0 & 0 & 0 & 0 & 0 \\ -\omega_y & \omega_x & R_{11}+k_{12} & 0 & 0 & -k_{21} & 0 & 0 & 0 & 0 & 0 & 0 \\ -k_{12} & 0 & 0 & R_{22}+k_{21}+k_{23}+k_{24} & -\Delta\omega_2 & \omega_y & -k_{32} & 0 & 0 & -k_{42} & 0 & 0 \\ 0 & -k_{12} & 0 & \Delta\omega_2 & R_{22}+k_{21}+k_{23}+k_{24} & \omega_x & 0 & -k_{32} & 0 & 0 & -k_{42} & 0 \\ 0 & 0 & -k_{12} & -\omega_y & \omega_x & R_{12}+k_{21}+k_{23}+k_{24} & 0 & 0 & -k_{32} & 0 & 0 & -k_{42} \\ 0 & 0 & 0 & -k_{23} & 0 & 0 & R_{23}+k_{32} & -\Delta\omega_3 & \omega_y & 0 & 0 & 0 \\ 0 & 0 & 0 & 0 & -k_{23} & 0 & \Delta\omega_3 & R_{23}+k_{32} & -\omega_x & 0 & 0 & 0 \\ 0 & 0 & 0 & 0 & 0 & -k_{23} & -\omega_y & \omega_x & R_{13}+k_{32} & 0 & 0 & 0 \\ 0 & 0 & 0 & -k_{24} & 0 & 0 & 0 & 0 & 0 & R_{24}+k_{42} & -\Delta\omega_4 & \omega_y \\ 0 & 0 & 0 & 0 & -k_{24} & 0 & 0 & 0 & 0 & -\Delta\omega_4 & R_{24}+k_{42} & -\omega_x \\ 0 & 0 & 0 & 0 & 0 & -k_{24} & 0 & 0 & 0 & -\omega_y & \omega_x & R_{14}+k_{42} \end{bmatrix}. \quad [8]$$

In eqs. 7 and 8,  $\Delta\omega_j = \Omega_j - \omega_{rf}$ , where  $\omega_{rf}$  is the angular frequency of the weak rf field applied in CEST;  $\omega_x$  and  $\omega_y$  are the x and y components of the rf field strength (in radians per second);  $R_{1j}$  is the longitudinal relaxation rate of a spin at state j.

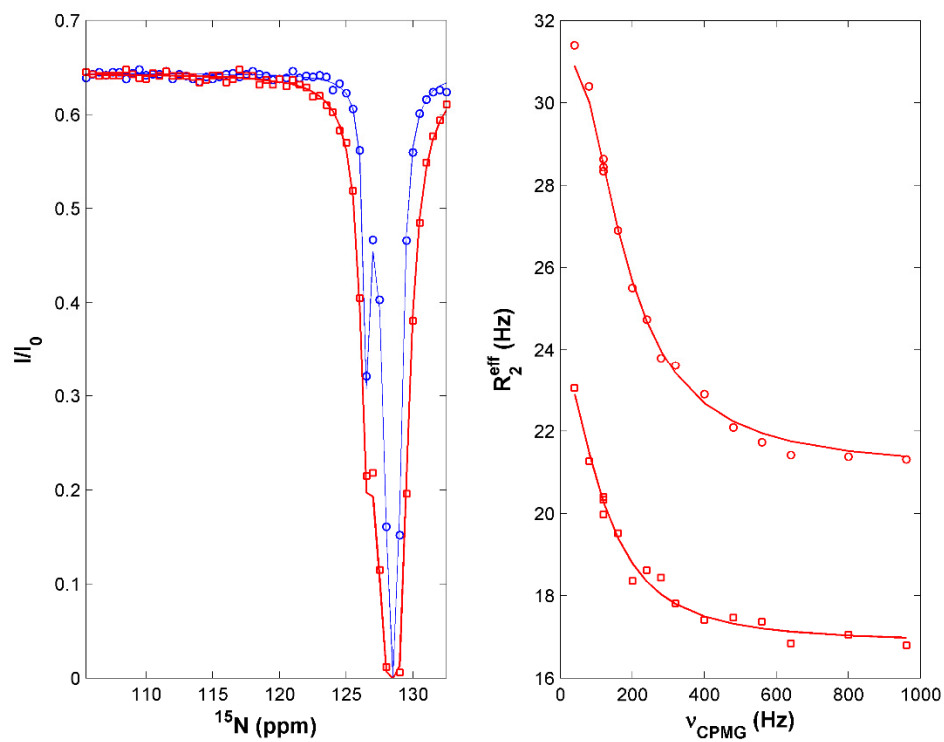

Figure S1. Representative experimental and calculated CEST (left panel) and RD (right panel) profiles described well by model I (Q42). Experimental CEST points recorded with rf field strengths of 13.6 and 27.2 Hz are indicated by  $\circ$  and  $\square$ , respectively. RD data points recorded on 800 and 500 MHz are indicated by  $\circ$  and  $\square$ , respectively. The best fits obtained with model I are solid lines.

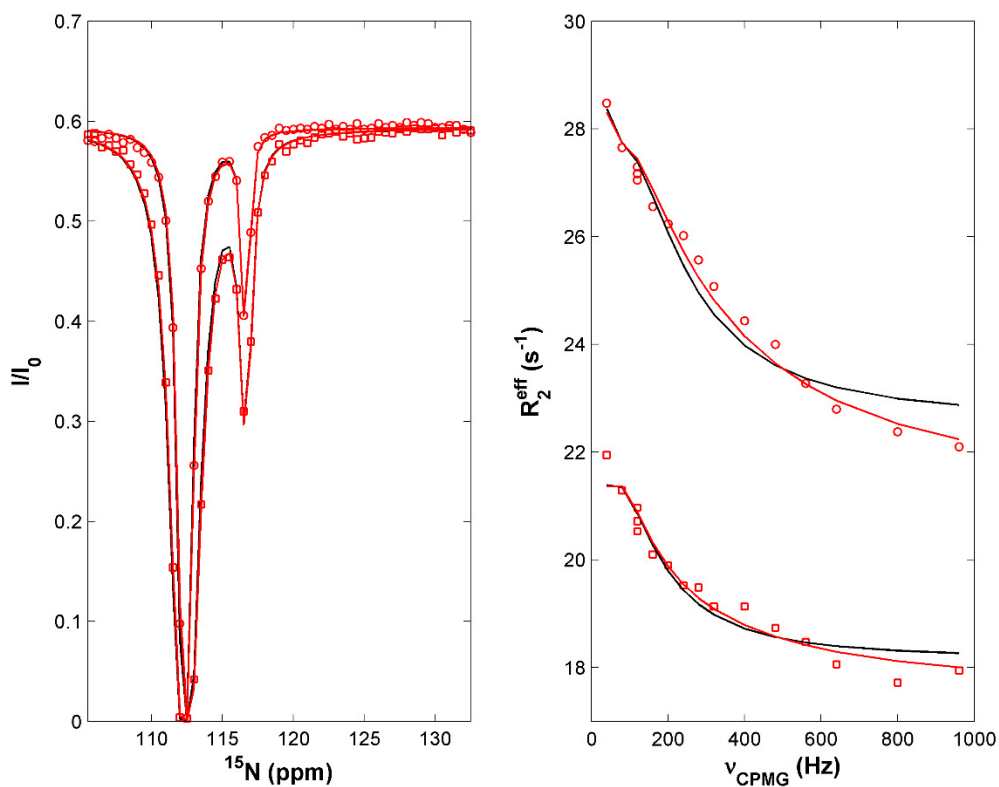

Figure S2. Representative experimental and calculated CEST (left panel) and RD (right panel) profiles described well by model IV rather than by model I (F55). Experimental CEST points recorded with rf field strengths of 13.6 and 27.2 Hz are indicated by  $\circ$  and  $\square$ , respectively. RD data points recorded on 800 and 500 MHz are indicated by  $\circ$  and  $\square$ , respectively. The best fits obtained with model I (3-state) are black solid lines, while the fits obtained with model IV (4-state) are red lines.

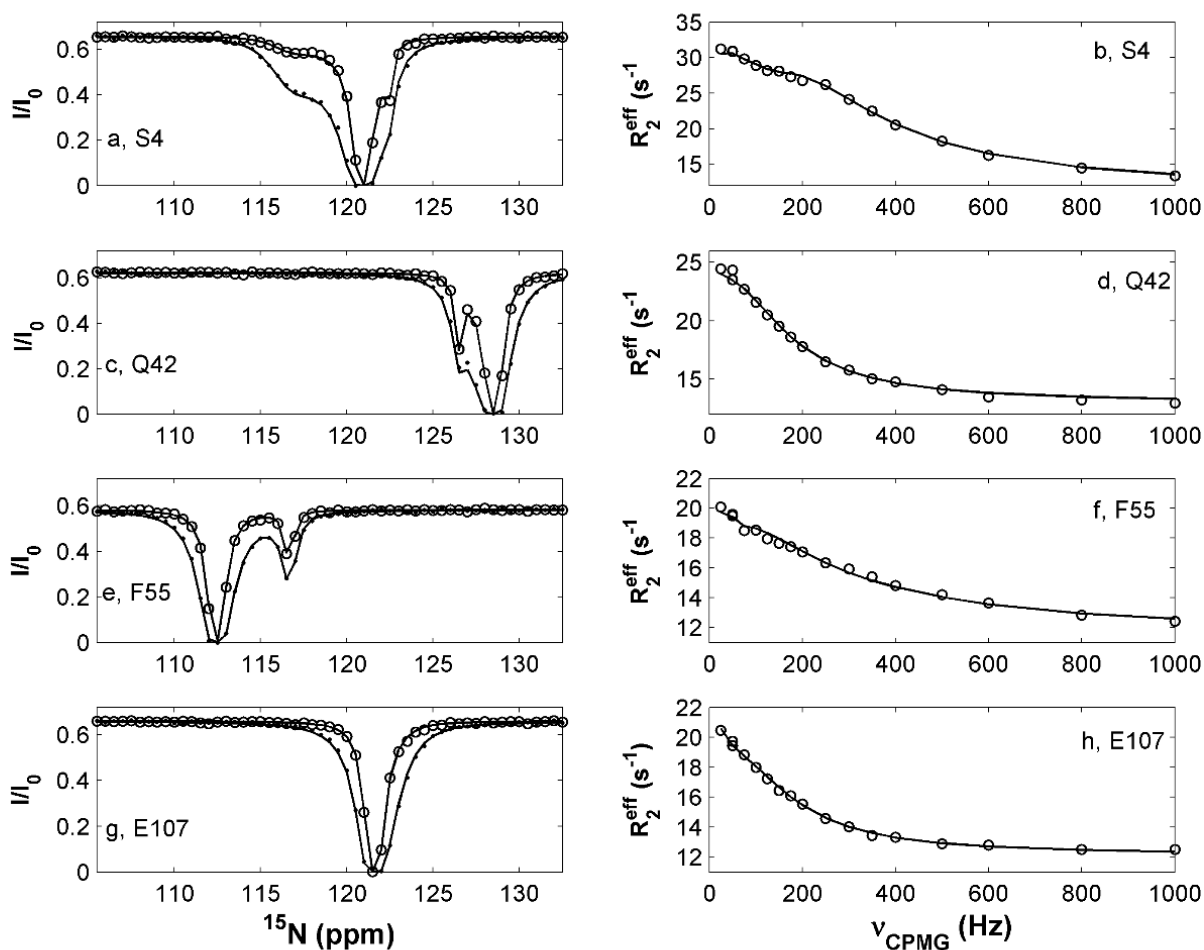

Figure S3. Representative CEST (a, c, e, and g) and RD (b, d, f, and h) profiles recorded at 0.7 mM hIFABP. The experimental CEST data at rf field fields of 13.6 and 27.2 Hz are indicated by “o” and “•”, respectively. The experimental RD data at 800 are indicated by “o”. The solid lines are best fits obtained with model I (a, b, c, d, g, and h) and model IV (e and f). Note that the  $R_2^{eff}$  values shown here were recorded with the continuous wave decoupling CPMG scheme, which are significantly smaller than those shown in Figure 1 that were acquired with the relaxation compensated scheme.

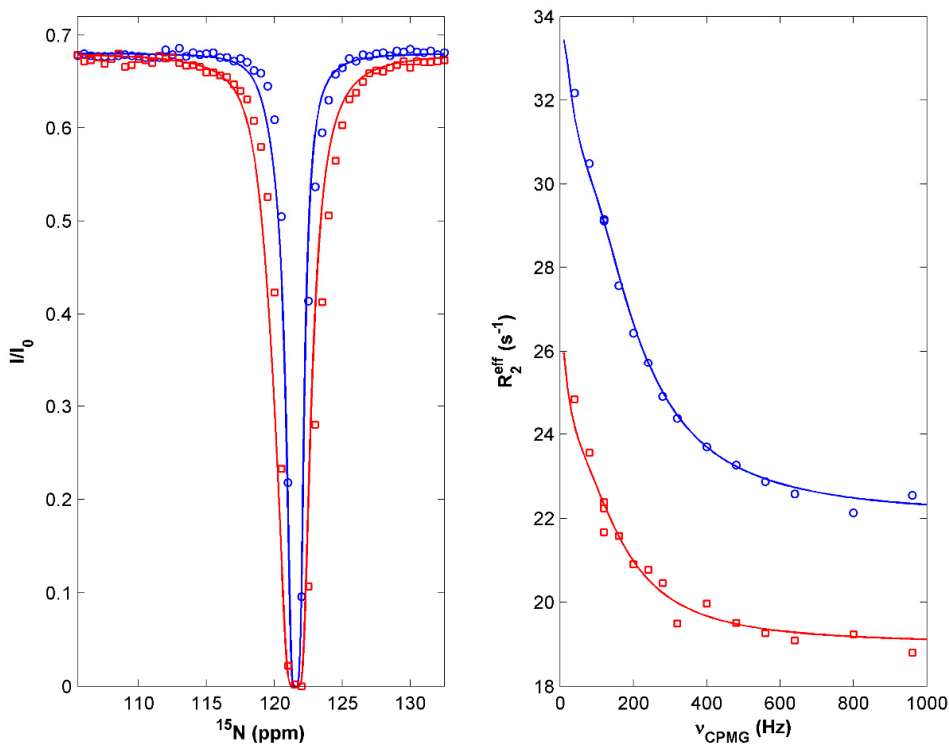

Figure S4. Experimental and calculated CEST (left panel) and RD (right panel) profiles of E107. Experimental CEST points recorded with rf field strengths of 13.6 and 27.2 Hz are indicated by  $\circ$  and  $\square$ , respectively. RD data points recorded on 800 and 500 MHz are indicated by  $\circ$  and  $\square$ , respectively. The solid lines were calculated with model I by assuming  $\nu(\text{I}_1) - \nu(\text{N}) = -0.41$  ppm and  $\nu(\text{I}_2) - \nu(\text{N}) = -1.83$  ppm.

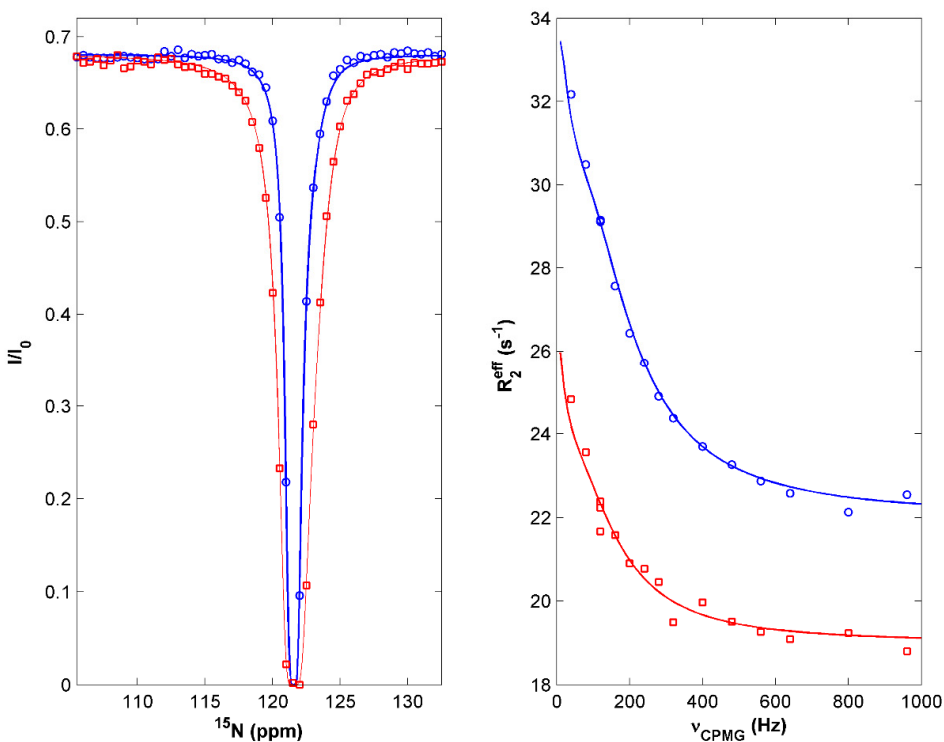

Figure S5. The experimental data used are the same as those shown in Fig. S4. However, the solid lines were calculated with model I by assuming  $\nu(\text{I}_1) - \nu(\text{N}) = -0.41$  ppm and  $\nu(\text{I}_2) - \nu(\text{N}) = +1.83$  ppm.

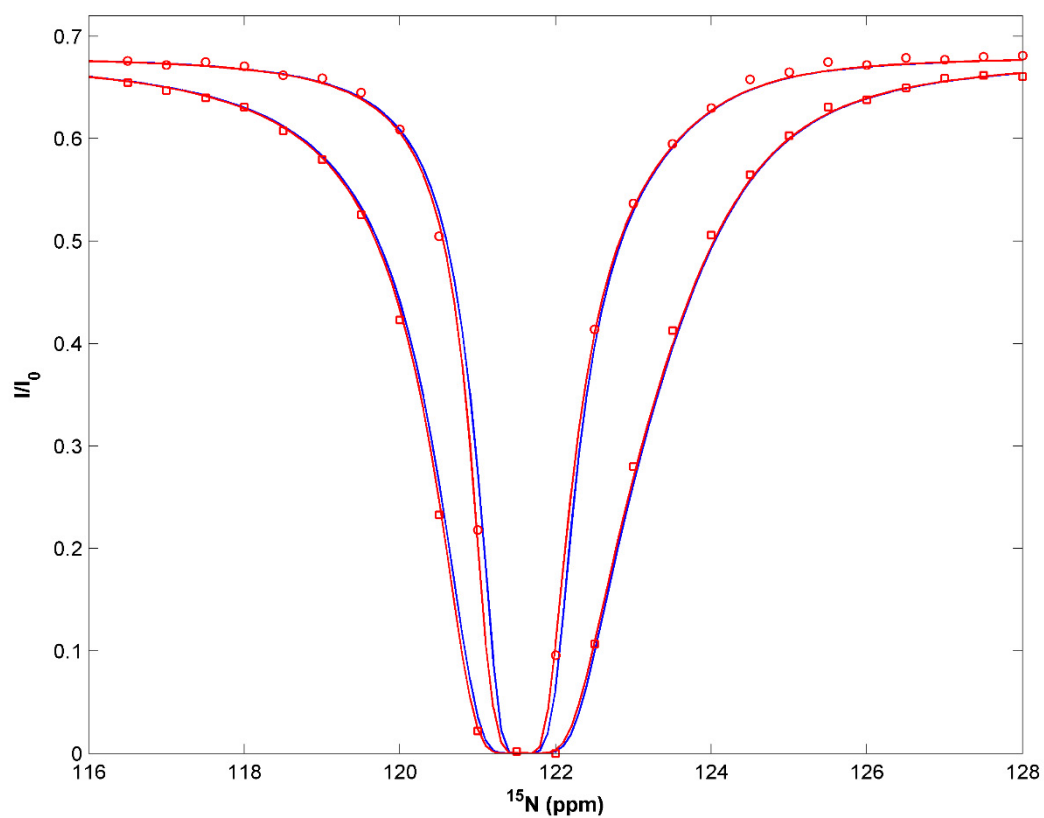

Figure S6. The experimental data used are the same as those shown in Fig. S4. Only the region from 116-128 ppm are displayed for better view. The red lines were calculated by assuming  $\nu(I_1) - \nu(N) = -0.41$  ppm and  $\nu(I_2) - \nu(N) = 1.83$  ppm, while the blue lines were obtained by assuming  $\nu(I_1) - \nu(N) = +0.41$  ppm and  $\nu(I_2) - \nu(N) = 1.83$  ppm.



Table S1. <sup>15</sup>N chemical shifts of major state (N) and minor states (I<sub>1</sub>, I<sub>2</sub>, and I<sub>3</sub>) and amide hydrogen exchange rates (k<sub>obs</sub>) and protection factors

| Res  | <sup>15</sup> N chemical shifts (ppm) |                |                |                |                | Amide hydrogen exchange                          |                                                    |
|------|---------------------------------------|----------------|----------------|----------------|----------------|--------------------------------------------------|----------------------------------------------------|
|      | N                                     | I <sub>1</sub> | I <sub>2</sub> | I <sub>3</sub> | U <sup>a</sup> | k <sub>obs</sub> (s <sup>-1</sup> ) <sup>b</sup> | P (k <sub>rc</sub> /k <sub>ex</sub> ) <sup>c</sup> |
| F2*  | 113.63                                | 111.84         | 116.45         |                | 119.13         | 0.6                                              | 13.3                                               |
| D3   | 119.26                                | 118.35         | 120.65         |                | 122.39         | 0.4                                              | 20.0                                               |
| S4*  | 120.99                                | 122.35         | 116.24         |                | 116.69         | 0.3                                              | 71.3                                               |
| T5*  | 116.24                                | 115.02         | 114.19         |                | 116.05         | 1.2                                              | 19.6                                               |
| W6*  | 128.75                                | 129.19         | 125.75         |                | 123.48         | 1.20x10 <sup>-4</sup>                            | 7.10x10 <sup>4</sup>                               |
| K7   | 123.47                                | 123.86         | 120.98         |                | 122.10         | 1.44x10 <sup>-4</sup>                            | 6.80x10 <sup>4</sup>                               |
| V8*  | 128.39                                | 126.62         | 127.58         |                | 121.34         | -                                                | -                                                  |
| D9   | 128.19                                | 128.61         | 127.38         |                | 124.65         | 7.20x10 <sup>-4</sup>                            | 6.98x10 <sup>3</sup>                               |
| R10  | 112.92                                | 112.66         | 113.65         |                | 121.91         | 1.26x10 <sup>-3</sup>                            | 8.72x10 <sup>3</sup>                               |
| S11  | 113.75                                | 112.78         | 113.12         |                | 117.74         | 3.3                                              | 16.3                                               |
| E12* | 122.62                                | 121.25         | 123.18         |                | 122.85         | 1.84x10 <sup>-2</sup>                            | 4.63x10 <sup>2</sup>                               |
| Y14  | 121.14                                | 121.79         | 119.71         |                | 120.55         | 1.7                                              | 9.1                                                |
| D15  | 118.59                                | -              | -              |                | 123.00         | -                                                | -                                                  |
| K16* | 119.69                                | 120.68         | 119.12         |                | 121.55         | 0.7                                              | 11.9                                               |
| F17  | 121.43                                | n              | n              |                | 121.30         | 2.23x10 <sup>-4</sup>                            | 4.71x10 <sup>4</sup>                               |
| M18  | 118.21                                | 118.39         | 117.55         |                | 122.14         | 1.55x10 <sup>-4</sup>                            | 1.00x10 <sup>5</sup>                               |
| E19  | 120.13                                | n              | n              |                | 122.24         | 2.51x10 <sup>-4</sup>                            | 2.19x10 <sup>4</sup>                               |
| K20  | 123.12                                | n              | n              |                | 122.43         | 6.14x10 <sup>-4</sup>                            | 1.45x10 <sup>4</sup>                               |
| M21  | 115.43                                | n              | n              |                | 121.31         | 6.07x10 <sup>-4</sup>                            | 2.94x10 <sup>4</sup>                               |
| G22  | 108.30                                | 108.85         | 107.75         |                | 110.14         | 0.3                                              | 110.7                                              |
| V23  | 121.53                                | 120.84         | 120.96         |                | 120.18         | 0.4                                              | 10.2                                               |
| N24* | 126.50                                | 127.65         | 127.69         |                | 123.01         | 6.0                                              | 5.1                                                |
| I25* | 121.19                                | 122.75         | 122.34         |                | 121.16         | 4.7                                              | 1.1                                                |
| V26* | 121.67                                | 120.31         | 122.09         |                | 124.68         | 0.7                                              | 2.3                                                |
| K27  | 119.32                                | n              | n              |                | 125.80         | 2.3                                              | 4.0                                                |
| R28  | 119.52                                | n              | n              |                | 122.67         | 3.4                                              | 6.4                                                |
| K29  | 119.50                                | 118.79         | 119.05         |                | 122.86         | 6.6                                              | 3.2                                                |
| L30  | 119.71                                | 119.28         | 119.06         |                | 123.18         | 1.4                                              | 3.4                                                |
| A31  | 120.15                                | 121.30         | 121.02         |                | 124.74         | 1.9                                              | 4.5                                                |
| A32* | 117.17                                | 119.57         | 116.31         |                | 123.04         | 3.4                                              | 4.1                                                |
| H33* | 116.88                                | 115.56         | 117.90         |                | 117.92         | 5.0                                              | 2.2                                                |
| D34* | 119.08                                | 120.77         | 118.31         |                | 121.75         | 3.0                                              | 3.2                                                |
| N35* | 119.17                                | 120.69         | 118.08         |                | 118.95         | 3.9                                              | 7.2                                                |
| L36* | 119.55                                | 120.84         | 120.37         |                | 122.64         | 0.3                                              | 25.4                                               |
| K37* | 126.41                                | 128.31         | 125.69         |                | 121.79         | 0.01-0.1                                         | 78-780                                             |
| L38* | 123.06                                | 125.75         | 125.55         |                | 123.26         | 2.20x10 <sup>-4</sup>                            | 2.18x10 <sup>4</sup>                               |
| T39* | 121.29                                | 117.83         | 122.42         |                | 114.69         | 3.13x10 <sup>-4</sup>                            | 2.32x10 <sup>4</sup>                               |
| I40  | 128.58                                | 129.17         | 126.47         |                | 123.27         | 2.42x10 <sup>-3</sup>                            | 1.69x10 <sup>3</sup>                               |
| T41* | 121.31                                | 122.97         | 119.88         |                | 118.14         | 4.56x10 <sup>-4</sup>                            | 1.52x10 <sup>4</sup>                               |
| Q42* | 128.53                                | 126.46         | 126.85         |                | 122.80         | 0.3                                              | 84.0                                               |
| E43  | 128.65                                | 128.05         | 127.83         |                | 122.47         | 0.2                                              | 34.0                                               |
| G44  | 117.63                                | -              | -              |                | 109.79         | -                                                | -                                                  |
| N45  | 113.18                                | 112.45         | 114.48         |                | 118.74         | 9.9                                              | 6.4                                                |
| K46  | 120.89                                | n              | n              | n              | 121.57         | 8.87x10 <sup>-3</sup>                            | 2.97x10 <sup>3</sup>                               |

|      |        |        |        |        |        |                       |                      |
|------|--------|--------|--------|--------|--------|-----------------------|----------------------|
| F47* | 126.35 | 124.45 | 127.05 | 125.30 | 121.53 | 1.31x10 <sup>-2</sup> | 8.01x10 <sup>2</sup> |
| T48* | 115.81 | 119.18 | 116.25 | 113.76 | 116.22 | 3.85x10 <sup>-4</sup> | 3.51x10 <sup>4</sup> |
| V49  | 127.81 | 128.12 | 127.27 | 126.24 | 123.15 | 2.21x10 <sup>-4</sup> | 1.98x10 <sup>4</sup> |
| K50* | 128.28 | 123.79 | 127.42 | 126.59 | 125.76 | 3.06x10 <sup>-4</sup> | 2.99x10 <sup>4</sup> |
| E51* | 127.07 | 127.90 | 129.33 | 124.69 | 122.03 | 2.87x10 <sup>-3</sup> | 1.96x10 <sup>3</sup> |
| S52* | 120.40 | 119.69 | 121.73 | 120.26 | 117.11 | -                     | -                    |
| S53* | 121.42 | 115.37 | 122.12 | 119.73 | 118.23 | 0.4                   | 161.6                |
| A54* | 120.59 | 126.83 | 119.64 | 122.58 | 125.72 | 5.5                   | 5.0                  |
| F55* | 112.39 | 116.68 | 111.77 | 114.36 | 119.43 | 1.6                   | 5.0                  |
| R56* | 114.46 | 118.17 | 113.09 | 116.84 | 123.31 | 0.9                   | 21.2                 |
| N57  | 120.44 | -      | -      | -      | 120.41 | -                     | -                    |
| I58* | 118.54 | 117.01 | 117.03 | 120.59 | 121.11 | 0.3                   | 17.9                 |
| E59* | 124.54 | 126.00 | 123.25 | 126.86 | 124.93 | 1.1                   | 2.3                  |
| V60* | 127.55 | 125.01 | 128.90 | 123.15 | 121.58 | 0.01-0.1              | 19.5-195             |
| V61  | 125.72 | 126.03 | 125.53 | 123.62 | 124.43 | 6.14x10 <sup>-3</sup> | 3.25x10 <sup>2</sup> |
| F62* | 121.44 | 123.32 | 121.11 | 122.71 | 124.55 | 3.09x10 <sup>-5</sup> | 1.87x10 <sup>5</sup> |
| E63  | 120.25 | 120.66 | 120.63 | 118.84 | 122.61 | 6.72x10 <sup>-3</sup> | 7.30x10 <sup>2</sup> |
| L64* | 125.14 | 123.20 | 125.26 | 122.95 | 123.10 | 1.49x10 <sup>-3</sup> | 1.73x10 <sup>3</sup> |
| G65  | 108.76 | 109.78 | 108.59 | 110.08 | 109.57 | 5.15x10 <sup>-3</sup> | 3.08x10 <sup>3</sup> |
| V66* | 122.47 | 121.25 | 122.49 | 120.72 | 120.48 | 4.38x10 <sup>-5</sup> | 9.32x10 <sup>4</sup> |
| T67* | 129.48 | 128.14 | 128.67 |        | 118.05 | 7.3                   | 1.1                  |
| F68  | 127.05 | n      | n      |        | 122.60 | 1.38x10 <sup>-4</sup> | 9.14x10 <sup>4</sup> |
| N69  | 117.23 | 117.70 | 116.55 |        | 120.52 | 0.3                   | 163.6                |
| Y70* | 122.32 | 125.87 | 123.26 |        | 120.71 | 0.2                   | 77.5                 |
| N71  | 121.02 | 121.81 | 123.41 |        | 121.00 | 1.0                   | 48.0                 |
| L72* | 121.99 | 120.70 | 122.84 |        | 122.57 | 3.53x10 <sup>-3</sup> | 2.15x10 <sup>3</sup> |
| G75  | 108.22 | 107.93 | 109.04 |        | 109.54 | 2.6                   | 6.5                  |
| T76  | 119.99 | n      | n      |        | 113.92 | 2.0                   | 8.7                  |
| E77* | 129.02 | 127.99 | 129.57 |        | 123.05 | 0.3                   | 22.7                 |
| L78  | 126.09 | 125.70 | 125.29 |        | 123.04 | 1.54x10 <sup>-4</sup> | 1.67x10 <sup>4</sup> |
| R79  | 119.40 | n      | n      |        | 122.12 | 5.48x10 <sup>-6</sup> | 2.95x10 <sup>6</sup> |
| G80  | 116.32 | 115.77 | 115.56 |        | 110.77 | 4.45x10 <sup>-5</sup> | 9.61x10 <sup>5</sup> |
| T81  | 107.05 | 107.91 | 106.47 |        | 113.75 | 3.21x10 <sup>-5</sup> | 5.43x10 <sup>5</sup> |
| W82  | 120.37 | 119.79 | 121.63 |        | 123.36 | -                     | -                    |
| S83  | 115.84 | n      | n      |        | 116.33 | 5.29x10 <sup>-6</sup> | 4.76x10 <sup>6</sup> |
| L84  | 125.63 | n      | n      |        | 124.07 | 0.2                   | 36.2                 |
| E85  | 127.85 | 128.43 | 127.30 |        | 121.60 | 0.2                   | 13.2                 |
| G86  | 117.63 | -      | -      |        | 109.79 | -                     | -                    |
| N87* | 122.87 | 121.32 | 122.21 |        | 118.74 | 9.6                   | 6.5                  |
| K88  | 118.32 | n      | n      |        | 121.65 | 2.33x10 <sup>-3</sup> | 1.13x10 <sup>4</sup> |
| L89* | 123.76 | 121.59 | 122.83 |        | 123.02 | <5x10 <sup>-6</sup>   | >3.6x10 <sup>6</sup> |
| I90  | 125.39 | n      | n      |        | 121.35 | <5x10 <sup>-6</sup>   | >1.2x10 <sup>7</sup> |
| G91  | 122.27 | 121.90 | 121.46 |        | 113.06 | <5x10 <sup>-6</sup>   | >5.2x10 <sup>6</sup> |
| K92  | 128.45 | 128.82 | 127.59 |        | 120.87 | 3.34x10 <sup>-4</sup> | 5.59x10 <sup>4</sup> |
| F93  | 121.93 | n      | n      |        | 121.52 | 1.01x10 <sup>-4</sup> | 7.53x10 <sup>4</sup> |
| K94  | 119.69 | n      | n      |        | 123.53 | 1.83x10 <sup>-5</sup> | 7.92x10 <sup>5</sup> |
| R95  | 122.40 | 122.86 | 123.32 |        | 122.67 | 0.4                   | 54.7                 |
| T96  | 116.23 | 115.77 | 117.23 |        | 115.56 | 1.1                   | 17.7                 |
| D97  | 121.02 | n      | n      |        | 122.67 | 0.4                   | 27.5                 |
| N98  | 117.04 | n      | n      |        | 119.35 | 0.5                   | 56.4                 |
| G99  | 108.15 | n      | n      |        | 109.26 | 0.3                   | 179.3                |

|       |        |        |        |        |                       |                     |
|-------|--------|--------|--------|--------|-----------------------|---------------------|
| N100  | 119.63 | n      | n      | 118.57 | $9.75 \times 10^{-3}$ | $6.48 \times 10^3$  |
| E101  | 120.36 | n      | n      | 121.07 | 0.01-0.1              | 89.3-893            |
| L102  | 124.63 | 125.25 | 125.35 | 122.88 | $3.57 \times 10^{-5}$ | $7.22 \times 10^4$  |
| N103  | 124.71 | 124.33 | 124.09 | 119.58 | $1.98 \times 10^{-4}$ | $1.33 \times 10^5$  |
| T104  | 118.71 | 118.71 | 117.66 | 114.68 | $2.09 \times 10^{-4}$ | $1.177 \times 10^5$ |
| V105  | 127.27 | n      | n      | 123.02 | $4.45 \times 10^{-5}$ | $9.83 \times 10^4$  |
| R106  | 124.58 | n      | n      | 125.70 | $4.08 \times 10^{-5}$ | $2.95 \times 10^5$  |
| E107  | 121.53 | 121.12 | 123.36 | 122.51 | $4.53 \times 10^{-5}$ | $1.57 \times 10^5$  |
| I108  | 124.86 | -      | -      | 121.57 | -                     | -                   |
| I109  | 130.26 | n      | n      | 124.72 | $5.14 \times 10^{-4}$ | $2.95 \times 10^3$  |
| G110  | 119.37 | n      | n      | 112.61 | 11.8                  | 1.3                 |
| D111  | 124.86 | -      | -      | 120.11 | -                     | -                   |
| E112  | 118.68 | n      | n      | 121.05 | $1.34 \times 10^{-4}$ | $2.11 \times 10^4$  |
| L113  | 123.96 | n      | n      | 123.06 | $1.58 \times 10^{-5}$ | $1.63 \times 10^5$  |
| V114  | 128.30 | 128.63 | 127.59 | 121.15 | $< 5 \times 10^{-6}$  | $> 3.4 \times 10^5$ |
| Q115  | 130.73 | n      | n      | 124.81 | $9.19 \times 10^{-5}$ | $1.25 \times 10^5$  |
| T116* | 122.04 | 120.92 | 120.53 | 115.34 | $1.22 \times 10^{-4}$ | $1.53 \times 10^5$  |
| Y117  | 126.24 | 125.77 | 125.32 | 122.86 | $1.01 \times 10^{-4}$ | $1.16 \times 10^5$  |
| V118  | 120.17 | 120.79 | 120.89 | 122.75 | $7.09 \times 10^{-5}$ | $4.37 \times 10^4$  |
| Y119  | 128.22 | n      | n      | 124.63 | $9.83 \times 10^{-5}$ | $5.47 \times 10^4$  |
| E120  | 126.26 | n      | n      | 123.50 | 0.2                   | 24                  |
| G121  | 127.72 | n      | n      | 109.96 | 0.01-0.1              | 182.3-1823          |
| V122  | 123.70 | n      | n      | 120.30 | $2.56 \times 10^{-4}$ | $1.59 \times 10^4$  |
| E123  | 126.68 | n      | n      | 125.27 | $2.27 \times 10^{-2}$ | $1.36 \times 10^2$  |
| A124  | 126.38 | 125.83 | 127.05 | 125.20 | $3.04 \times 10^{-4}$ | $3.22 \times 10^4$  |
| K125  | 116.66 | 117.39 | 115.96 | 120.65 | $7.37 \times 10^{-4}$ | $1.71 \times 10^4$  |
| R126* | 120.50 | 121.69 | 119.64 | 122.43 | $2.06 \times 10^{-4}$ | $1.06 \times 10^5$  |
| I127  | 123.59 | 123.17 | 122.96 | 121.94 | $1.17 \times 10^{-4}$ | $3.65 \times 10^4$  |
| F128  | 126.90 | n      | n      | 124.41 | $1.83 \times 10^{-4}$ | $2.56 \times 10^4$  |
| K129  | 118.80 | 118.42 | 120.38 | 123.66 | $1.97 \times 10^{-4}$ | $7.35 \times 10^4$  |
| K130  | 123.72 | 123.20 | 125.54 | 122.29 | $5.48 \times 10^{-3}$ | $3.03 \times 10^3$  |
| D131* | 130.32 | 129.16 | 131.01 | na     | $7.16 \times 10^{-3}$ | $1.28 \times 10^3$  |

n: No RD dispersion was observed on the 800 MHz spectrometer, indicating the chemical shifts in the native and intermediate states are very similar.

-: due to peak overlap or weak peak, the data are not available.

na: the prediction value is not available.

\*: CEST profiles displayed two obvious dips ( $> 80$  Hz) and as well in RD profiles  $R_{ex} > 2$  s<sup>-1</sup> on 500 MHz NMR.

<sup>a</sup>: The shifts in the unfolded state were predicted using the ncIDP predictor tool

(<http://nmr.chem.rug.nl/ncIDP/>).

<sup>b</sup>: For the exchange rates larger than 0.1 s<sup>-1</sup>, they were measured by the amide hydrogen exchange method in 95% H<sub>2</sub>O and 5% D<sub>2</sub>O. For the rates smaller than 0.01 s<sup>-1</sup>, they were measured by the H-D exchange method. For those between 0.01 and 0.1 s<sup>-1</sup>, they were estimated based on the dead time (180 s) of the H-D exchange experiment and the lower limit of the amide hydrogen exchange method. The H-D exchange data were recorded for 5.5 hours at pH 7.1, 30 °C. So the exchange rates could not be measured accurately if they are smaller than  $5 \times 10^{-6}$  s<sup>-1</sup>.

<sup>c</sup>:  $k_{rc}$  was predicted using an online software tool (<http://sblab.sastra.edu/cintx.html>).
